# Supplementary material for: Enhanced Responsivity and Optoelectronic Properties of Self-Powered Solar-Blind Ag2O/β-Ga2O3 Heterojunction-Based Photodetector with Ag:AZO Co-Sputtered Electrode
Source: MDPI journal article supplement (doi:10.3390/nano13071287), 2023-04-06
Supplement: s1 [file s1]

## Enhanced Responsivity and Optoelectronic Properties of Self-Powered Solar-Blind $\text{Ag}_2\text{O}/\beta\text{-Ga}_2\text{O}_3$ Heterojunction-Based Photodetector with Ag:AZO Co-Sputtered Electrode

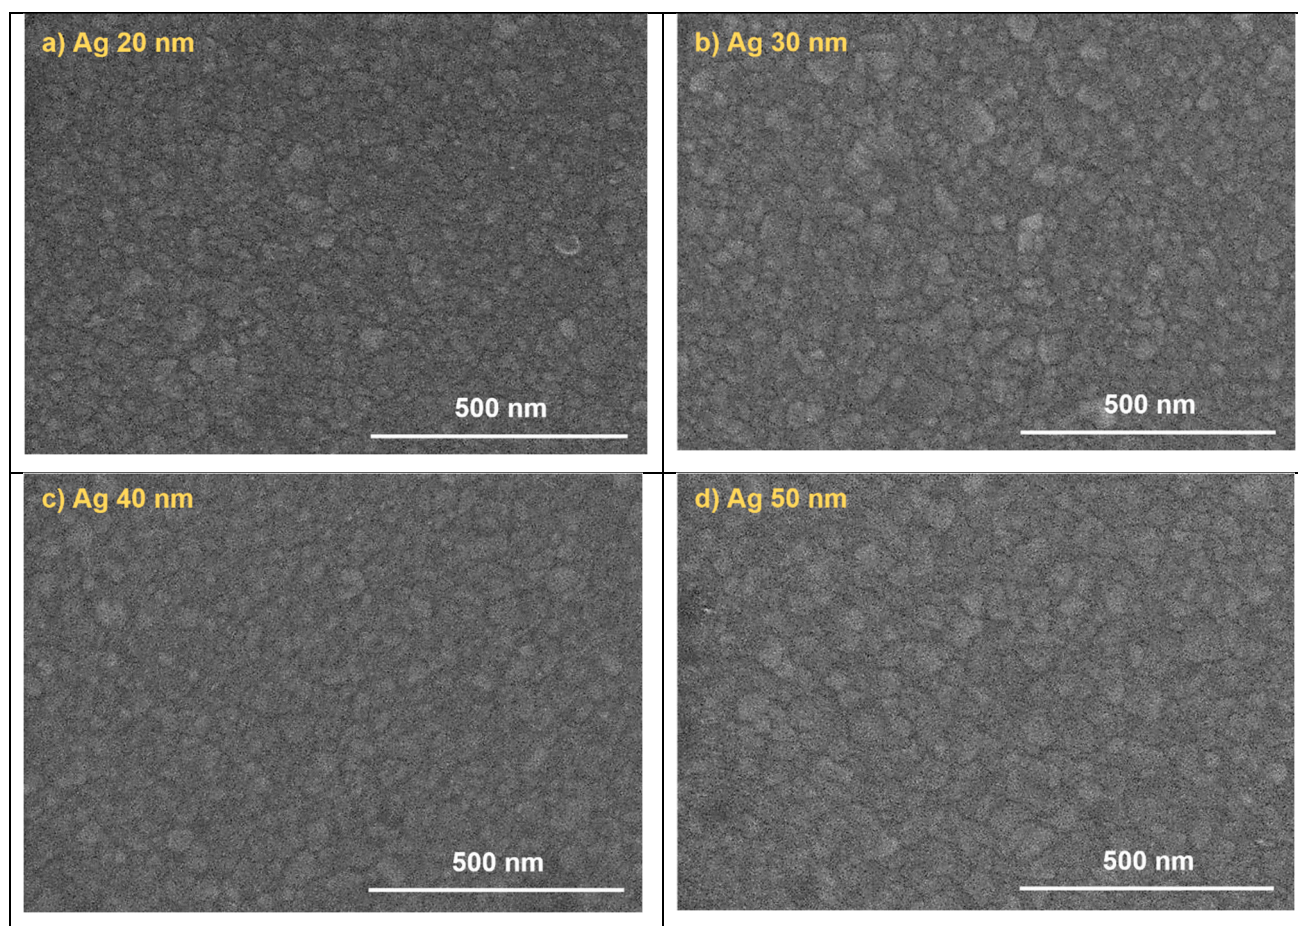

**Figure S1** Thickness-dependent SEM images of Ag thin films

a) 20 nm b) 30 nm c) 40 nm d) 50 nm

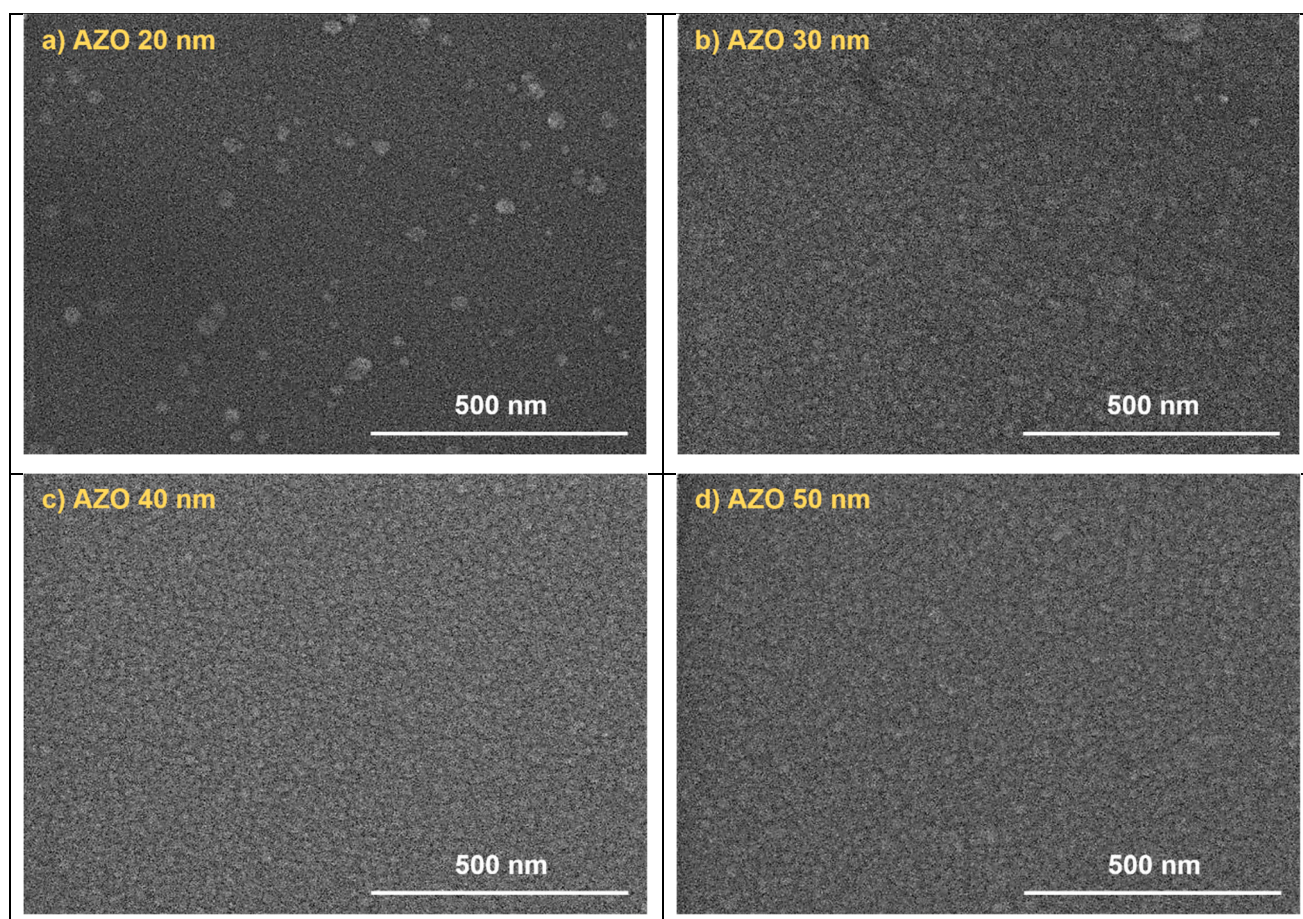

**Figure S2** Thickness-dependent SEM images of AZO thin films

a) 20 nm b) 30 nm c) 40 nm d) 50 nm

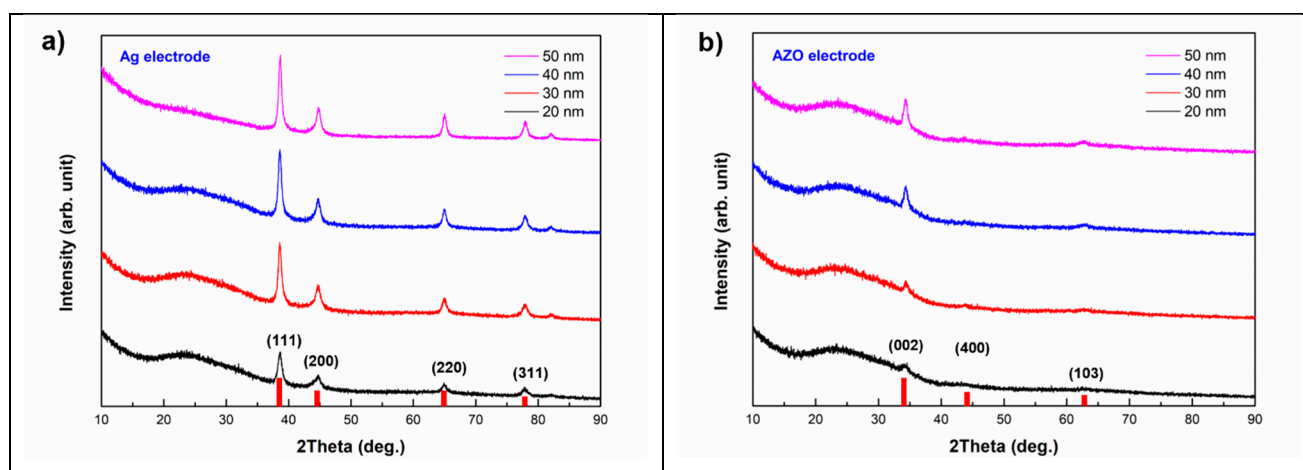

**Figure S3** Structural characteristics of Ag:AZO thin film depending on thickness

a) XRD patterns of Ag b) XRD patterns of AZO

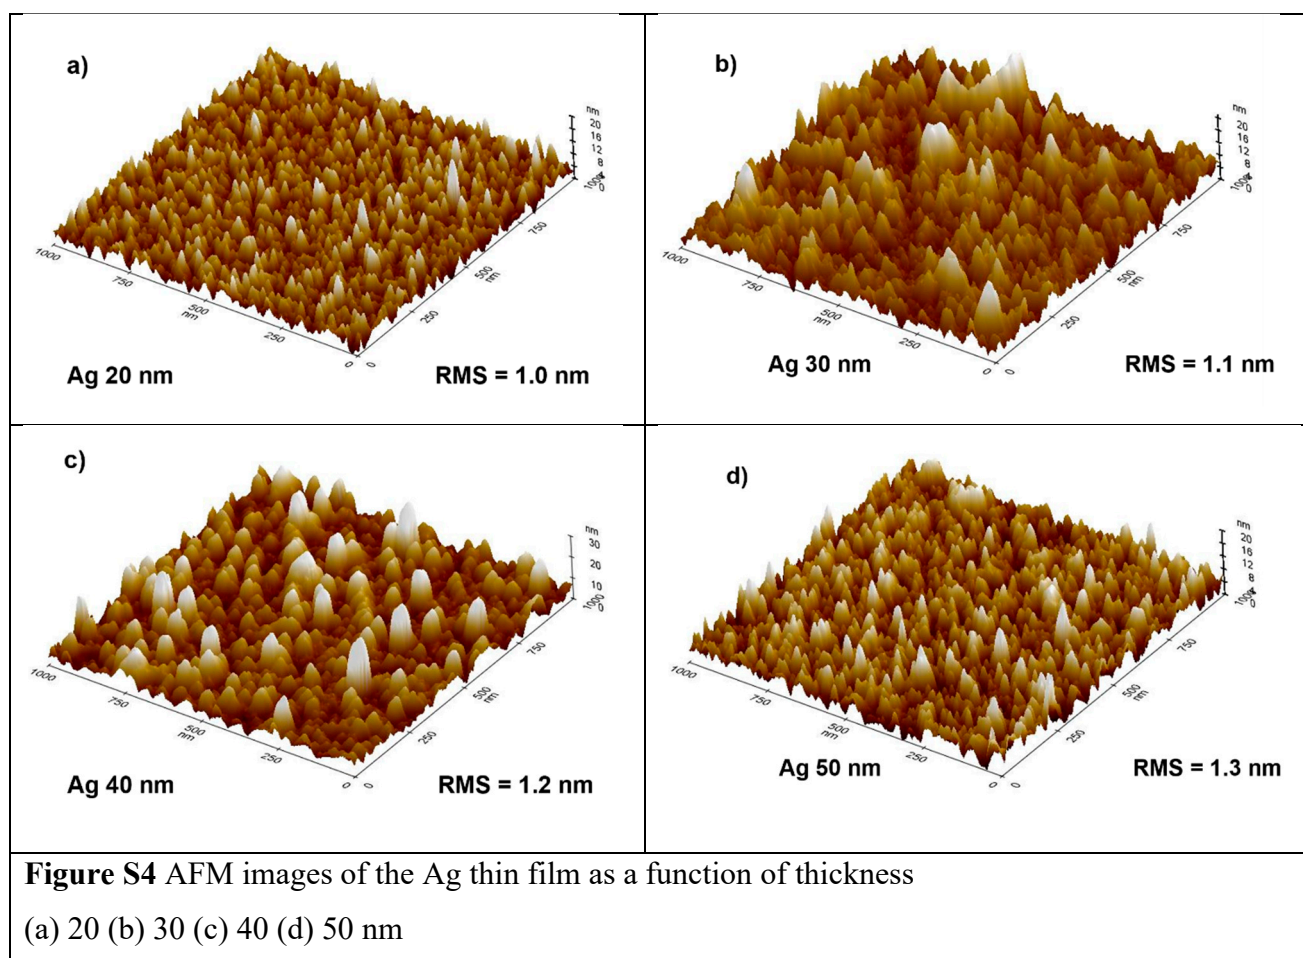

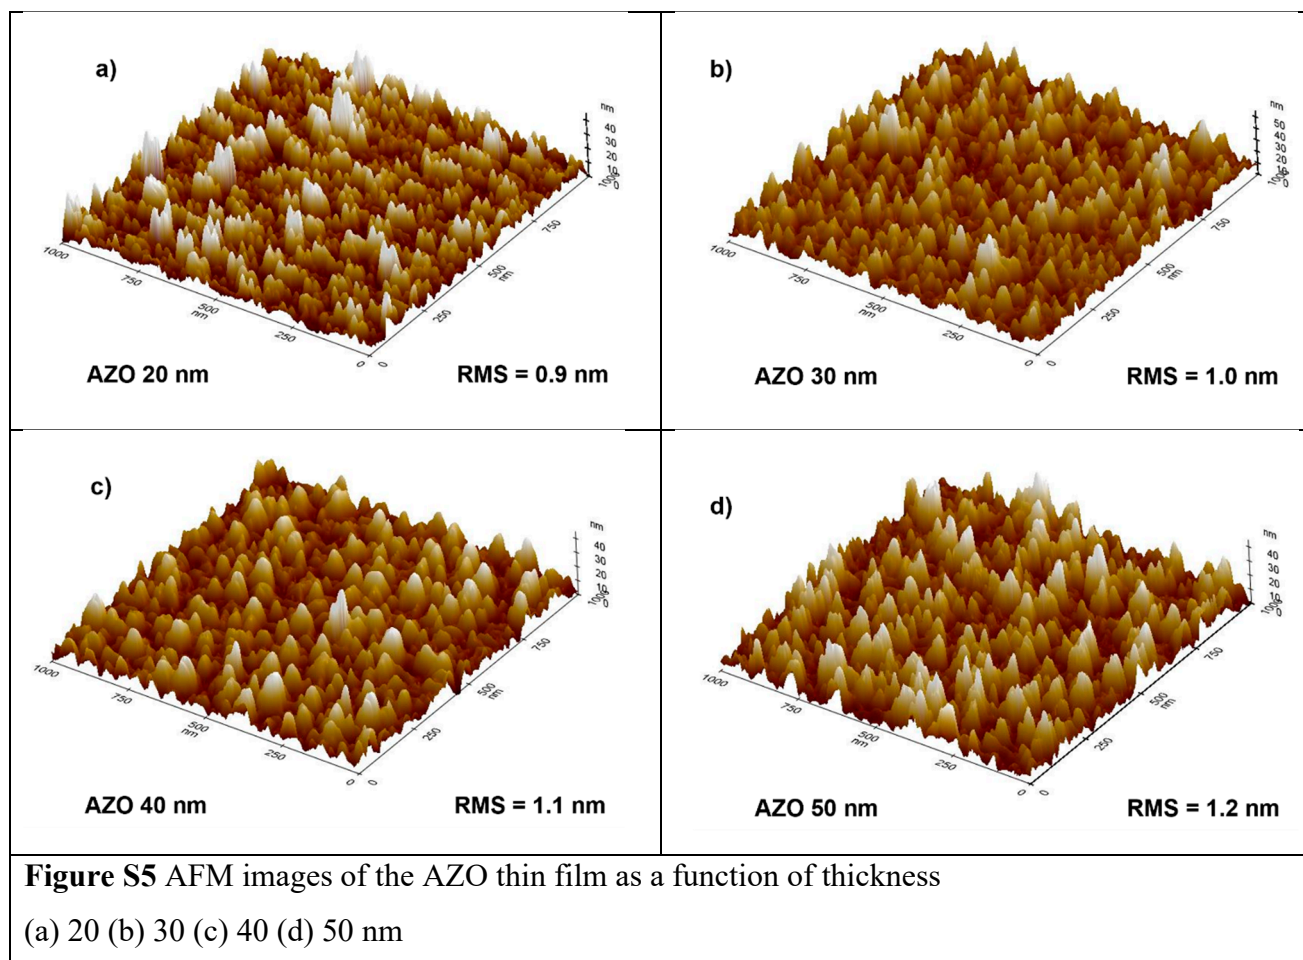

**Figure S5** AFM images of the AZO thin film as a function of thickness

(a) 20 (b) 30 (c) 40 (d) 50 nm

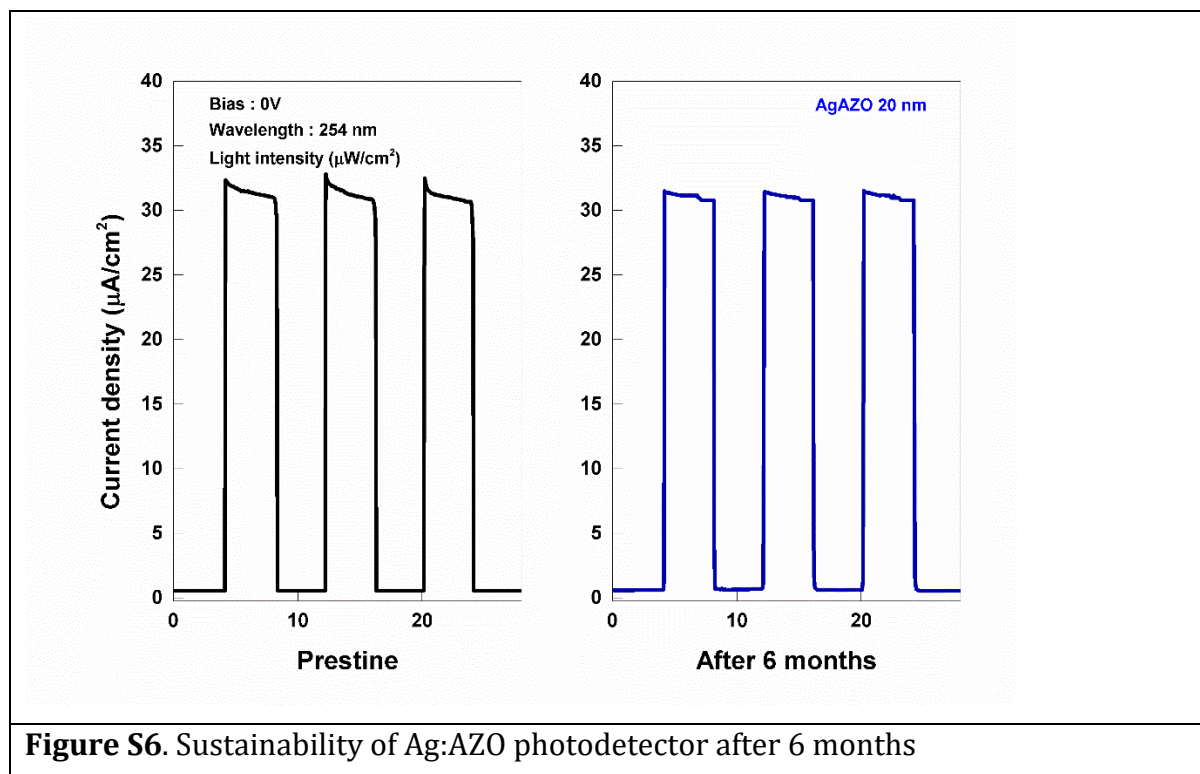

**Figure S6.** Sustainability of Ag:AZO photodetector after 6 months
